# Supplementary material for: Identification and pharmacokinetics of the major constituents of Fugan Fang in rat plasma
Source: Royal Society of Chemistry journal article supplement (doi:10.1039/c4ra14148b), 2015-01-01
Supplement: c4ra14148b1.pdf [file c4ra14148b1.pdf]

Supplementary Material Table 1. Identified compounds in Fugan Fang extract

| NO. | Identified Compounds                                         | Negative ion (m/z) |             | Positive ion (m/z) |             | Molecular   |                                                 | Fragment ions (m/z)                                                                                              | Plant origin                                      |
|-----|--------------------------------------------------------------|--------------------|-------------|--------------------|-------------|-------------|-------------------------------------------------|------------------------------------------------------------------------------------------------------------------|---------------------------------------------------|
|     |                                                              | Adduct             | Error (ppm) | Adduct             | Error (ppm) | Weight (Da) | Composition                                     |                                                                                                                  |                                                   |
| 1   | Gentiobiose                                                  | -H                 | -0.5        | +Na                | 0.3         | 342         | C <sub>12</sub> H <sub>22</sub> O <sub>11</sub> | 365[M+Na] <sup>+</sup> , 203[M+Na-Glc] <sup>+</sup> , 185 <sup>a</sup>                                           | Radix Gentianae                                   |
| 2   | Gentianose                                                   | -H                 | -0.6        | +Na                | -0.2        | 504         | C <sub>18</sub> H <sub>32</sub> O <sub>16</sub> | 527[M+Na] <sup>+</sup> , 365[M+Na-Glc] <sup>+</sup> , 203[M+Na-2Glc] <sup>+a</sup>                               | Radix Gentianae                                   |
| 3   | Gallic acid                                                  | -H                 | -0.7        |                    |             | 170         | C <sub>7</sub> H <sub>6</sub> O <sub>5</sub>    | 169[M-H] <sup>-</sup> , 125[M-H-CO2] <sup>-a</sup>                                                               | Flos Carthami                                     |
| 4   | Protocatechuic acid                                          | -H                 | 0.2         |                    |             | 154         | C <sub>7</sub> H <sub>6</sub> O <sub>4</sub>    | 153[M-H] <sup>-</sup> , 109[M-HCOO] <sup>-</sup> , 91[M-HCOO-H2O] <sup>-b</sup>                                  | Radix Angelicae Sinensis and<br>Caulis Spatholobi |
| 5   | Catechin                                                     | -H                 | 0.2         | +H                 | -0.3        | 290         | C <sub>15</sub> H <sub>14</sub> O <sub>6</sub>  | 289[M-H] <sup>-</sup> , 245[M-H-COO] <sup>-</sup> , 203, 109 <sup>b</sup>                                        | Caulis Spatholobi                                 |
| 6   | Caffeic acid                                                 | -H                 | -0.1        |                    |             | 180         | C <sub>9</sub> H <sub>8</sub> O <sub>4</sub>    | 179[M-H] <sup>-</sup> , 135[M-HCOO] <sup>-</sup>                                                                 | Radix Angelicae Sinensis                          |
| 7   | 6-Hydroxykaempferol -3,6-di-O-β-glucoside -7-O-β-glucuronide | -H                 | 2.2         |                    |             | 802         | C <sub>33</sub> H <sub>38</sub> O <sub>23</sub> | 801[M-H] <sup>-</sup> , 625[M-H-GA] <sup>-</sup> , 463[M-H-GA-Glc] <sup>-</sup> , 301[M-H-GA-2Glc] <sup>-a</sup> | Flos Carthami                                     |
| 8   | 6-Hydroxykaempferoltri -O-glucoside                          | -H                 | 2.2         |                    |             | 788         | C <sub>33</sub> H <sub>40</sub> O <sub>22</sub> | 787[M-H] <sup>-</sup> , 625[M-H-Glc] <sup>-</sup> , 463[M-H-2Glc] <sup>-</sup> , 301[M-H-3Glc] <sup>-a</sup>     | Flos Carthami                                     |
| 9   | Safflomin A                                                  | -H                 | 0.5         | +H                 | -0.3        | 612         | C <sub>27</sub> H <sub>32</sub> O <sub>16</sub> | 613[M+H] <sup>+</sup> , 595[M+H-H <sub>2</sub> O] <sup>+</sup> , 415, 289                                        | Flos Carthami                                     |
| 10  | Chlorogenic acid                                             | -H                 | 0.1         |                    |             | 354         | C <sub>16</sub> H <sub>18</sub> O <sub>9</sub>  | 353[M-H] <sup>-</sup> , 191[M-H-C9H6O3] <sup>-a</sup>                                                            | Flos Carthami                                     |
| 11  | Loganic acid or 8-hydroxy-10-hydrosweroside                  | -H                 | 0.7         | +H                 | 1           | 376         | C <sub>16</sub> H <sub>24</sub> O <sub>10</sub> | 375[M-H] <sup>-</sup> , 213[M-H-Glc] <sup>-</sup> , 169[M-H-Glc-COO] <sup>-</sup>                                | Radix Gentianae                                   |
| 12  | Hydroxysafflor yellow A                                      | -H                 | 0.5         | +H                 | -0.3        | 612         | C <sub>27</sub> H <sub>32</sub> O <sub>16</sub> | 613[M+H] <sup>+</sup> , 451[M+H-Glc] <sup>+</sup> , 433, 313, 211 <sup>ab</sup>                                  | Flos Carthami                                     |
| 13  | Chlorogenic acid isomer                                      | -H                 | 0.1         |                    |             | 354         | C <sub>16</sub> H <sub>18</sub> O <sub>9</sub>  | 353[M-H] <sup>-</sup> , 191[M-H-C9H6O3] <sup>-a</sup>                                                            | Flos Carthami                                     |

|    |                                                              |    |      |    |      |     |                                                  |                                                                                                                          |                                                      |
|----|--------------------------------------------------------------|----|------|----|------|-----|--------------------------------------------------|--------------------------------------------------------------------------------------------------------------------------|------------------------------------------------------|
| 14 | Epicatechin                                                  | -H | 0.2  | +H | -0.3 | 290 | C <sub>15</sub> H <sub>14</sub> O <sub>6</sub>   | 289[M-H] <sup>-</sup> ;245[M-H-COO] <sup>-</sup> ;203,109 <sup>b</sup>                                                   | Caulis Spatholobi                                    |
| 15 | Gentiopicroside                                              | -H | -0.5 | +H | -0.2 | 356 | C <sub>16</sub> H <sub>20</sub> O <sub>9</sub>   | 357[M+H] <sup>+</sup> ,195[M+H-Glc] <sup>+</sup> ,177[M+H-Glc-H <sub>2</sub> O] <sup>+</sup> ,<br>149,121 <sup>+ab</sup> | Radix Gentianae                                      |
| 16 | Protocatechuic acid isomer                                   | -H | 0.2  |    |      | 154 | C <sub>7</sub> H <sub>6</sub> O <sub>4</sub>     | 153[M-H] <sup>-</sup> , 109[M-HCOO] <sup>-</sup> , 91[M-HCOO-H <sub>2</sub> O] <sup>-b</sup>                             | Radix Angelicae<br>Sinensis and<br>Caulis Spatholobi |
| 17 | Sweroside                                                    | -H | -0.6 | +H | 0    | 358 | C <sub>16</sub> H <sub>22</sub> O <sub>9</sub>   | 359[M+H] <sup>+</sup> , 197[M+H-Glc] <sup>+</sup> ,179[M+H-Glc-H <sub>2</sub> O] <sup>+</sup> , 127 <sup>ab</sup>        | Radix Gentianae                                      |
| 18 | Daidzin                                                      |    |      | +H | -0.6 | 416 | C <sub>21</sub> H <sub>20</sub> O <sub>9</sub>   | 417[M+H] <sup>+</sup> , 255[M+H-Glc] <sup>+</sup>                                                                        | Caulis Spatholobi                                    |
| 19 | Gentianine                                                   | -H | -0.6 |    |      | 175 | C <sub>10</sub> H <sub>9</sub> NO <sub>2</sub>   | 174[M-H] <sup>-</sup> , 131[M-H-C <sub>2</sub> H <sub>4</sub> O] <sup>-</sup> , 87                                       | Radix Gentianae                                      |
| 20 | 6-Hydroxykaempferol-di-O-glucoside                           | -H | 1.9  |    |      | 626 | C <sub>27</sub> H <sub>30</sub> O <sub>17</sub>  | 625[M-H] <sup>-</sup> ;463[M-H-Glc] <sup>-</sup> ; 301[M-H-2Glc] <sup>-a</sup>                                           | Flos Carthami                                        |
| 21 | P-coumaric acid                                              | -H | 0.1  |    |      | 164 | C <sub>9</sub> H <sub>8</sub> O <sub>3</sub>     | 163[M-H] <sup>-</sup> ; 119[M-H-COO] <sup>-</sup> ; 93 <sup>b</sup>                                                      | Flos Carthami                                        |
| 22 | Calycosin-7-O-β-D-glucoside                                  | -H | -0.1 | +H | -0.4 | 446 | C <sub>22</sub> H <sub>22</sub> O <sub>10</sub>  | 447[M+H] <sup>+</sup> , 285[M+H-Glc] <sup>+</sup> ,<br>270[M+H-Glc-CH <sub>3</sub> ] <sup>+ab</sup>                      | Radix Astragali<br>and Caulis<br>Spatholobi          |
| 23 | Ferulic acid                                                 | -H | 1.1  |    |      | 194 | C <sub>10</sub> H <sub>10</sub> O <sub>4</sub>   | 193[M-H] <sup>-</sup> ;178[M-H-CH <sub>3</sub> ] <sup>-</sup> ; 134[M-H-CH <sub>3</sub> -COO] <sup>-ab</sup>             | Radix Angelicae<br>Sinensis                          |
| 24 | 6-Hydroxykaempferol-3-O-β-D-glucopyranoside or Isoquercitrin | -H | -0.3 | +H | -0.6 | 464 | C <sub>21</sub> H <sub>20</sub> O <sub>12</sub>  | 463[M-H] <sup>-</sup> ; 301[M-H-Glc] <sup>-</sup> ;271 <sup>a</sup>                                                      | Flos Carthami                                        |
| 25 | Tinctormine                                                  | -H | 1.3  |    |      | 593 | C <sub>27</sub> H <sub>31</sub> NO <sub>14</sub> | 592[M-H] <sup>-</sup> ; 472, 244 <sup>a</sup>                                                                            | Flos Carthami                                        |
| 26 | Rutin                                                        | -H | 0.6  |    |      | 610 | C <sub>27</sub> H <sub>30</sub> O <sub>16</sub>  | 609[M-H] <sup>-</sup> ; 301[M-H-rutinoside] <sup>-a</sup>                                                                | Flos Carthami                                        |
| 27 | 6-Hydroxykaempferol-3-O-β-D-glucopyranoside or Isoquercitrin | -H | -0.3 | +H | -0.6 | 464 | C <sub>21</sub> H <sub>20</sub> O <sub>12</sub>  | 463[M-H] <sup>-</sup> ; 301[M-H-Glc] <sup>-</sup> ;271 <sup>a</sup>                                                      | Flos Carthami                                        |
| 28 | Calycosin-7-O-β-D-glc-6''-O-malonate                         |    |      | +H | 1.4  | 532 | C <sub>25</sub> H <sub>24</sub> O <sub>13</sub>  | 533[M+H] <sup>+</sup> , 285[M+H-C <sub>3</sub> H <sub>2</sub> O <sub>3</sub> -Glc] <sup>+</sup> , 270, 253 <sup>a</sup>  | Radix Astragali                                      |

|    |                                                            |    |     |     |      |     |                                                  |                                                                                                                                    |                                             |
|----|------------------------------------------------------------|----|-----|-----|------|-----|--------------------------------------------------|------------------------------------------------------------------------------------------------------------------------------------|---------------------------------------------|
| 29 | Cartormin                                                  | -H | 0.2 | +H  | 0.3  | 575 | C <sub>27</sub> H <sub>29</sub> NO <sub>13</sub> | 576[M+H] <sup>+</sup> , 414[M+H-Glc] <sup>+</sup> , 354, 276                                                                       | Flos Carthami                               |
| 30 | Kaempferol-3-O-rutinose                                    | -H | 1.7 | +H  | -0.8 | 594 | C <sub>27</sub> H <sub>30</sub> O <sub>15</sub>  | 593, 285[M-H-rutinose] <sup>-</sup> , 257 <sup>a</sup>                                                                             | Flos Carthami                               |
| 31 | Ononin                                                     |    |     | +H  | -0.2 | 430 | C <sub>22</sub> H <sub>22</sub> O <sub>9</sub>   | 431[M+H] <sup>+</sup> , 269[M+H-Glc] <sup>+</sup> , 254, 237, 226 <sup>a</sup>                                                     | Radix Astragali<br>and Caulis<br>Spatholobi |
| 32 | (6αR, 11αR)-9,10-dimethoxypterocarpan-3-O-β-D-glucoside    |    |     | +H  | -0.1 | 462 | C <sub>23</sub> H <sub>26</sub> O <sub>10</sub>  | 463[M+H] <sup>+</sup> , 167[M+H-Glc] <sup>+</sup> , 152 <sup>a</sup>                                                               | Radix Astragali                             |
| 33 | Calycosin-7-O-β-D-glucoside-6"-O-acetate                   |    |     | +H  | -0.6 | 488 | C <sub>24</sub> H <sub>24</sub> O <sub>11</sub>  | 489[M+H] <sup>+</sup> , 285[M+H-C <sub>2</sub> H <sub>2</sub> O-Glc] <sup>+</sup> , 270, 253 <sup>a</sup>                          | Radix Astragali                             |
| 34 | Daidzein                                                   | -H | 0.6 | +H  | -0.9 | 254 | C <sub>15</sub> H <sub>10</sub> O <sub>4</sub>   | 253[M-H] <sup>-</sup> , 224[M-H-CHO] <sup>-</sup> , 208, 132 <sup>a</sup>                                                          | Caulis Spatholobi                           |
| 35 | (3R)-2'-hydroxy-3',4'-dimethoxyisoflavan-7-O-β-D-glucoside | -H | 0.5 | +H  | -0.6 | 464 | C <sub>23</sub> H <sub>28</sub> O <sub>10</sub>  | 465[M+H] <sup>+</sup> , 303[M+H-Glc] <sup>+</sup> , 167 <sup>a</sup>                                                               | Radix Astragali                             |
| 36 | Rindoside                                                  |    |     | +Na | -0.5 | 798 | C <sub>35</sub> H <sub>42</sub> O <sub>21</sub>  | 821[M+Na] <sup>+</sup> , 523, 505, 321 <sup>a</sup>                                                                                | Radix Gentianae                             |
| 37 | Quercetin                                                  | -H | 0.0 |     |      | 302 | C <sub>15</sub> H <sub>10</sub> O <sub>7</sub>   | 301[M-H] <sup>-</sup> , 273, 179, 165, 151 <sup>b</sup>                                                                            | Flos Carthami                               |
| 38 | Calycosin                                                  | -H | 0.5 | +H  | -0.2 | 284 | C <sub>16</sub> H <sub>12</sub> O <sub>5</sub>   | 285[M+H] <sup>+</sup> , 270[M+H-CH <sub>3</sub> ] <sup>+</sup> , 253[M+H-CH <sub>3</sub> OH] <sup>+</sup> , 225, 213 <sup>ab</sup> | Radix Astragali<br>and Caulis<br>Spatholobi |
| 39 | Trifloroside                                               | -H | 3.0 | +Na | 0.3  | 782 | C <sub>35</sub> H <sub>42</sub> O <sub>20</sub>  | 805[M+Na] <sup>+</sup> , 507, 321 <sup>a</sup>                                                                                     | Radix Gentianae                             |
| 40 | (6αR, 11αR)-3-hydroxy-9,10-dimethoxypterocarpan            | -H | 1.7 | +H  | 3.2  | 300 | C <sub>17</sub> H <sub>16</sub> O <sub>5</sub>   | 301[M+H] <sup>+</sup> , 167, 152, 134 <sup>a</sup>                                                                                 | Radix Astragali                             |
| 41 | Senkyunolide F                                             | -H | 0.1 | +H  | -0.6 | 206 | C <sub>12</sub> H <sub>14</sub> O <sub>3</sub>   | 205[M-H] <sup>-</sup> , 161, 131, 106                                                                                              | Radix Angelicae<br>Sinensis                 |
| 42 | Formononetin                                               | -H | 1.9 | +H  | 0.4  | 268 | C <sub>16</sub> H <sub>12</sub> O <sub>4</sub>   | 269[M+H] <sup>+</sup> , 254[M+H-CH <sub>3</sub> ] <sup>+</sup> , 226[M+H-CH <sub>3</sub> -CO] <sup>+</sup> , 197 <sup>ab</sup>     | Radix Astragali                             |

|    |                                   |    |      |     |      |     |                                                 |                                                                                                                               |                             |
|----|-----------------------------------|----|------|-----|------|-----|-------------------------------------------------|-------------------------------------------------------------------------------------------------------------------------------|-----------------------------|
|    |                                   |    |      |     |      |     |                                                 |                                                                                                                               | and Caulis<br>Spatholobi    |
| 43 | Astragaloside V/Astragaloside VI  | -H | -1.6 | +Na | -1   | 947 | C <sub>47</sub> H <sub>78</sub> O <sub>19</sub> | 969[M+Na] <sup>+</sup> , 789[M+Na-H <sub>2</sub> O-Glc] <sup>+a</sup>                                                         | Radix Astragali             |
| 44 | Ligustilide (E)                   |    |      | +H  | 0.2  | 190 | C <sub>12</sub> H <sub>14</sub> O <sub>2</sub>  | 191[M+H] <sup>+</sup> , 173[M+H-H <sub>2</sub> O] <sup>+</sup> , 163[M+H-H <sub>2</sub> O-CO] <sup>+</sup> , 145 <sup>a</sup> | Radix Angelicae<br>Sinensis |
| 45 | Astragaloside V/ Astragaloside VI | -H | -1.0 | +Na | -1   | 947 | C <sub>47</sub> H <sub>78</sub> O <sub>19</sub> | 969[M+Na] <sup>+</sup> , 789[M+Na-H <sub>2</sub> O-Glc] <sup>+a</sup>                                                         | Radix Astragali             |
| 46 | Astragaloside IV                  | -H | -0.8 | +Na | -0.6 | 784 | C <sub>41</sub> H <sub>68</sub> O <sub>14</sub> | 807[M+Na] <sup>+</sup> , 627[M+Na-H <sub>2</sub> O-Glc] <sup>+ab</sup>                                                        | Radix Astragali             |
| 47 | Astragaloside III                 | -H | -0.8 | +Na | -0.8 | 784 | C <sub>41</sub> H <sub>68</sub> O <sub>14</sub> | 807[M+Na] <sup>+</sup> , 627[M+Na-H <sub>2</sub> O-Glc] <sup>+ab</sup>                                                        | Radix Astragali             |
| 48 | Astragaloside II                  |    |      | +Na | -0.7 | 826 | C <sub>43</sub> H <sub>70</sub> O <sub>15</sub> | 849[M+Na] <sup>+</sup> , 669.40                                                                                               | Radix Astragali             |
| 49 | isoAstragaloside II               |    |      | +Na | -0.7 | 826 | C <sub>43</sub> H <sub>70</sub> O <sub>15</sub> | 849[M+Na] <sup>+</sup> , 669.40                                                                                               | Radix Astragali             |
| 50 | Ligustilide (Z)                   |    |      | +H  | 0.2  | 190 | C <sub>12</sub> H <sub>14</sub> O <sub>2</sub>  | 191[M+H] <sup>+</sup> , 173[M+H-H <sub>2</sub> O] <sup>+</sup> , 163[M+H-H <sub>2</sub> O-CO] <sup>+</sup> , 145 <sup>a</sup> | Radix Angelicae<br>Sinensis |
| 51 | Astragaloside I                   |    |      | +Na | -2   | 868 | C <sub>45</sub> H <sub>72</sub> O <sub>16</sub> | 891[M+Na] <sup>+</sup> , 831,711 <sup>b</sup>                                                                                 | Radix Astragali             |
| 52 | Isoastragaloside I                |    |      | +Na | -2.7 | 868 | C <sub>45</sub> H <sub>72</sub> O <sub>16</sub> | 891[M+Na] <sup>+</sup> , 831,711 <sup>b</sup>                                                                                 | Radix Astragali             |
| 53 | Cyclocephaloside II               |    |      | +Na | -0.7 | 826 | C <sub>43</sub> H <sub>70</sub> O <sub>15</sub> | 849[M+Na] <sup>+</sup> , 669.40                                                                                               | Radix Astragali             |

**Supplementary Material Table 2.** Calibration curve, linear range and LLOQ for calycosin-7-O-β-D-glucoside, ononin, ferulic acid, p-coumaric acid, gentiopicroside, sweroside, formononetin, and protocatechuic acid in plasma (n = 5)

| Compounds                         | R      | Linear range(ng/mL) | Calibration curve | LLOQ <sup>a</sup> (ng/mL) | LOD <sup>b</sup> (ng/mL) |
|-----------------------------------|--------|---------------------|-------------------|---------------------------|--------------------------|
| Calycosin-7-O-β-D-Glucopyranoside | 0.9992 | 0.5-161             | y=0.481x+0.0418   | 0.5                       | 0.2                      |
| Ononin                            | 0.9990 | 0.28-88.8           | y=0.833x+0.0771   | 0.28                      | 0.1                      |
| Ferulic acid                      | 0.9990 | 2-640.9             | y=0.0194x+0.028   | 2                         | 1                        |

|                     |        |           |                    |      |      |
|---------------------|--------|-----------|--------------------|------|------|
| p-Coumaric acid     | 0.9991 | 10.1-3230 | $y=0.0382x+0.0624$ | 10.1 | 6    |
| Gentiopicroside     | 0.9985 | 1.8-578.4 | $y=0.125x+0.0999$  | 1.8  | 0.2  |
| Sweroside           | 0.9992 | 0.65-206  | $y=0.294x+0.0658$  | 0.65 | 0.2  |
| Formononetin        | 0.9990 | 0.1-33    | $y=0.423x+0.0323$  | 0.1  | 0.05 |
| Protocatechuic acid | 0.9991 | 4-1280    | $y=0.0156x+0.105$  | 4    | 2.5  |

---

a. lower limit of quantitation (the lowest point on the calibration curve).

b. limit of detection

**Supplementary Material Table 3.** Precision and accuracy of calycosin-7-O- $\beta$ -D-glucoside, ononin, ferulic acid, p-coumaric acid, gentiopicroside, sweroside, formononetin, and protocatechuic acid from QC samples prepared in rat plasma (mean  $\pm$  SD)

| Compounds                                 | Nominal concentration<br>(ng/mL) | Intraday ( n = 5)      |  |           |          | Interday ( n = 5*3)    |  |           |          |
|-------------------------------------------|----------------------------------|------------------------|--|-----------|----------|------------------------|--|-----------|----------|
|                                           |                                  | Measured concentration |  | Precision | Accuracy | Measured concentration |  | Precision | Accuracy |
|                                           |                                  | (ng/mL)                |  | (%)       | (%)      | (ng/mL)                |  | (%)       | (%)      |
| Calycosin-7-O- $\beta$ -D-Glucopyranoside | 1.01                             | 1.08 $\pm$ 0.02        |  | 1.8       | 107.1    | 1.03 $\pm$ 0.06        |  | 6.0       | 101.7    |
|                                           | 16.1                             | 16.50 $\pm$ 0.52       |  | 3.2       | 102.5    | 16.10 $\pm$ 1.07       |  | 6.6       | 100.0    |
|                                           | 129                              | 130.00 $\pm$ 5.74      |  | 4.4       | 100.8    | 122.60 $\pm$ 2.61      |  | 2.1       | 95.0     |
| Ononin                                    | 0.555                            | 0.56 $\pm$ 0.02        |  | 2.8       | 101.7    | 0.60 $\pm$ 0.04        |  | 6.2       | 107.8    |
|                                           | 8.88                             | 9.01 $\pm$ 0.18        |  | 2.0       | 101.4    | 9.14 $\pm$ 0.51        |  | 5.6       | 102.9    |
|                                           | 71                               | 71.58 $\pm$ 2.10       |  | 2.9       | 100.8    | 67.96 $\pm$ 0.78       |  | 1.2       | 95.7     |
| Ferulic acid                              | 4                                | 3.95 $\pm$ 0.11        |  | 2.7       | 98.7     | 3.91 $\pm$ 0.10        |  | 2.7       | 97.7     |
|                                           | 64                               | 67.44 $\pm$ 2.80       |  | 4.1       | 105.4    | 67.22 $\pm$ 4.58       |  | 6.8       | 105.0    |
|                                           | 512                              | 523.40 $\pm$ 19.10     |  | 3.6       | 102.2    | 515.40 $\pm$ 8.71      |  | 1.7       | 100.7    |
| p-Coumaric acid                           | 20.2                             | 19.10 $\pm$ 0.66       |  | 3.5       | 94.6     | 18.92 $\pm$ 0.67       |  | 3.5       | 93.7     |
|                                           | 323                              | 346.40 $\pm$ 12.54     |  | 3.6       | 107.2    | 338.00 $\pm$ 8.00      |  | 2.4       | 104.6    |
|                                           | 2580                             | 2656.00 $\pm$ 104.55   |  | 3.9       | 102.9    | 2576.00 $\pm$ 70.21    |  | 2.7       | 99.8     |
| Gentiopicroside                           | 3.62                             | 3.73 $\pm$ 0.15        |  | 3.9       | 103.1    | 3.58 $\pm$ 0.19        |  | 5.3       | 98.9     |
|                                           | 57.8                             | 58.86 $\pm$ 2.85       |  | 4.8       | 101.8    | 58.82 $\pm$ 1.86       |  | 3.2       | 101.8    |
|                                           | 463                              | 468.60 $\pm$ 24.46     |  | 5.2       | 101.2    | 467.40 $\pm$ 7.60      |  | 1.6       | 101.0    |
| Sweroside                                 | 1.29                             | 1.37 $\pm$ 0.04        |  | 2.6       | 105.9    | 1.35 $\pm$ 0.07        |  | 4.9       | 105.0    |
|                                           | 20.6                             | 21.46 $\pm$ 1.24       |  | 5.8       | 104.2    | 21.56 $\pm$ 0.99       |  | 4.6       | 104.7    |
|                                           | 165                              | 169.40 $\pm$ 8.71      |  | 5.1       | 102.7    | 166.00 $\pm$ 1.73      |  | 1.0       | 100.6    |
| Formononetin                              | 0.206                            | 0.21 $\pm$ 0.01        |  | 4.5       | 100.3    | 0.21 $\pm$ 0.01        |  | 3.6       | 100.6    |
|                                           | 3.3                              | 3.36 $\pm$ 0.16        |  | 4.8       | 101.9    | 3.35 $\pm$ 0.19        |  | 5.7       | 101.5    |
|                                           | 26.4                             | 26.66 $\pm$ 0.94       |  | 3.5       | 101.0    | 26.10 $\pm$ 0.37       |  | 1.4       | 98.9     |

|                     |      |                 |     |       |                 |     |       |
|---------------------|------|-----------------|-----|-------|-----------------|-----|-------|
| Protocatechuic acid | 8    | 7.64 ± 0.16     | 2.1 | 95.6  | 7.79 ± 0.60     | 7.8 | 97.4  |
|                     | 128  | 135.20 ± 4.76   | 3.5 | 105.6 | 131.60 ± 3.91   | 3.0 | 102.8 |
|                     | 1020 | 1074.00 ± 47.75 | 4.4 | 105.3 | 1056.00 ± 45.61 | 4.3 | 103.5 |

---

**Supplementary Material Table 4.** Extraction recovery, matrix effect and long-term stability of calycosin-7-O- $\beta$ -D-glucoside, ononin, ferulic acid, p-coumaric acid, gentiopicroside, sweroside, formononetin, and protocatechuic acid in rat plasma (n = 5)

| Compounds                                 | Nominal concentration<br>(ng/mL) | Recovery (%)    |      |  | Matrix effect (%) |     |  | Stability(%)     |      |  |
|-------------------------------------------|----------------------------------|-----------------|------|--|-------------------|-----|--|------------------|------|--|
|                                           |                                  | (mean $\pm$ SD) | RSD  |  | (mean $\pm$ SD)   | RSD |  | (mean $\pm$ SD)  | RSD  |  |
| Calycosin-7-O- $\beta$ -D-Glucopyranoside | 1.01                             | 93.6 $\pm$ 1.5  | 1.6  |  | 91.0 $\pm$ 2.3    | 2.5 |  | 85.1 $\pm$ 5.6   | 6.6  |  |
|                                           | 16.1                             | 95.2 $\pm$ 2.3  | 2.4  |  | 94.0 $\pm$ 2.2    | 2.3 |  | 101.1 $\pm$ 5.1  | 5.0  |  |
|                                           | 129                              | 89.3 $\pm$ 3.5  | 4.0  |  | 99.7 $\pm$ 3.6    | 3.6 |  | 89.6 $\pm$ 2.7   | 3.0  |  |
| Ononin                                    | 0.555                            | 96.0 $\pm$ 4.9  | 5.1  |  | 110.1 $\pm$ 3.5   | 3.2 |  | 97.5 $\pm$ 6.9   | 7.1  |  |
|                                           | 8.88                             | 96.5 $\pm$ 2.7  | 2.8  |  | 93.0 $\pm$ 2.5    | 2.7 |  | 102.9 $\pm$ 6.3  | 6.1  |  |
|                                           | 71                               | 85.4 $\pm$ 1.1  | 1.3  |  | 103.2 $\pm$ 3.3   | 3.2 |  | 85.7 $\pm$ 0.9   | 1.1  |  |
| Ferulic acid                              | 4                                | 97.6 $\pm$ 4.4  | 4.5  |  | 92.0 $\pm$ 6.3    | 6.9 |  | 103.0 $\pm$ 8.6  | 8.3  |  |
|                                           | 64                               | 91.3 $\pm$ 2.6  | 2.9  |  | 93.4 $\pm$ 1.3    | 1.4 |  | 112.5 $\pm$ 9.9  | 8.8  |  |
|                                           | 512                              | 93.6 $\pm$ 0.8  | 0.9  |  | 95.5 $\pm$ 2.6    | 2.7 |  | 100.0 $\pm$ 3.2  | 3.2  |  |
| p-Coumaric acid                           | 20.2                             | 90.2 $\pm$ 4.0  | 4.4  |  | 91.8 $\pm$ 6.6    | 7.2 |  | 105.1 $\pm$ 14.6 | 13.9 |  |
|                                           | 323                              | 89.7 $\pm$ 3.6  | 4.0  |  | 89.7 $\pm$ 1.4    | 1.5 |  | 85.9 $\pm$ 7.8   | 9.1  |  |
|                                           | 2580                             | 93.7 $\pm$ 8.2  | 8.7  |  | 87.1 $\pm$ 1.9    | 2.2 |  | 100.8 $\pm$ 1.1  | 1.1  |  |
| Gentiopicroside                           | 3.62                             | 93.7 $\pm$ 5.7  | 6.1  |  | 91.6 $\pm$ 1.3    | 1.5 |  | 89.3 $\pm$ 4.1   | 4.6  |  |
|                                           | 57.8                             | 92.1 $\pm$ 1.2  | 1.3  |  | 95.8 $\pm$ 3.2    | 3.4 |  | 102.8 $\pm$ 5.9  | 5.7  |  |
|                                           | 463                              | 86.3 $\pm$ 5.0  | 5.8  |  | 95.7 $\pm$ 3.8    | 4.0 |  | 90.1 $\pm$ 8.8   | 9.7  |  |
| Sweroside                                 | 1.29                             | 94.8 $\pm$ 0.7  | 0.8  |  | 91.0 $\pm$ 4.1    | 4.5 |  | 104.7 $\pm$ 7.7  | 7.3  |  |
|                                           | 20.6                             | 95.1 $\pm$ 2.1  | 2.2  |  | 98.8 $\pm$ 0.6    | 0.6 |  | 108.8 $\pm$ 11.0 | 10.2 |  |
|                                           | 165                              | 92.1 $\pm$ 5.6  | 6.1  |  | 94.4 $\pm$ 6.7    | 7.1 |  | 88.5 $\pm$ 2.3   | 2.6  |  |
| Formononetin                              | 0.206                            | 95.1 $\pm$ 12.3 | 12.9 |  | 93.6 $\pm$ 6.5    | 6.9 |  | 92.6 $\pm$ 4.6   | 4.9  |  |
|                                           | 3.3                              | 92.8 $\pm$ 5.1  | 5.5  |  | 96.1 $\pm$ 1.0    | 1.1 |  | 98.8 $\pm$ 11.0  | 11.1 |  |
|                                           | 26.4                             | 91.2 $\pm$ 3.4  | 3.7  |  | 98.5 $\pm$ 4.5    | 4.6 |  | 87.8 $\pm$ 8.2   | 9.4  |  |
| Protocatechuic acid                       | 8                                | 94.6 $\pm$ 3.3  | 3.5  |  | 98.9 $\pm$ 2.6    | 2.6 |  | 88.7 $\pm$ 7.2   | 8.2  |  |



|                  |      |      |       |     |       |       |     |       |        |     |
|------------------|------|------|-------|-----|-------|-------|-----|-------|--------|-----|
|                  | 128  | 90.0 | ± 1.2 | 1.4 | 108.4 | ± 5.4 | 5.0 | 100.8 | ± 4.6  | 4.5 |
|                  | 1020 | 92.2 | ± 4.4 | 4.7 | 90.4  | ± 4.3 | 4.8 | 106.3 | ± 10.5 | 9.8 |
| Wogonoside (IS+) | 135  | 95.5 | ± 2.2 | 2.3 | 96.1  | ± 3.2 | 3.3 |       |        |     |
| Rhein (IS-)      | 135  | 91.0 | ± 2.4 | 2.6 | 97.7  | ± 4.7 | 4.8 |       |        |     |

---
